# Supplementary material for: Intestinal α-Defensins Play a Minor Role in Modulating the Small Intestinal Microbiota Composition as Compared to Diet
Source: PubMed Central journal article supplement (PMC10269482; doi:10.1128/spectrum.00567-23), 2023-04-11
Supplement: spectrum.00567-23-s0001.pdf [file spectrum.00567-23-s0001.pdf]

**Supplementary Table 1.** Effect of diet or genotype on bacteria relative abundance by 2-way ANOVA analysis.

| <b>Jejunum content</b>              |             |                   |             |         |             |               |
|-------------------------------------|-------------|-------------------|-------------|---------|-------------|---------------|
| Phylum or genera relative abundance | Diet        |                   | Genotype    |         | Interaction |               |
|                                     | % variation | p-value           | % variation | p-value | % variation | p-value       |
| Firmicutes                          | 60.13       | <b>&lt;0.0001</b> | 1.44        | 0.2714  | 2.53        | 0.1491        |
| Bacteroidetes                       | 65.66       | <b>&lt;0.0001</b> | 0.60        | 0.4832  | 0.05        | 0.8285        |
| Actinobacteria                      | 7e-3        | 0.9580            | 0.69        | 0.6219  | 20.25       | <b>0.0118</b> |
| Bifidobacterium                     | 0.50        | 0.6680            | 3.24        | 0.2832  | 17.32       | <b>0.0173</b> |
| Coriobacteriaceae_UCG-002           | 4.84        | 0.2338            | 0.24        | 0.7859  | 0.09        | 0.8628        |
| Streptococcus                       | 0.74        | 0.6293            | 2.82        | 0.3492  | 5.91        | 0.1790        |
| Lactobacillus                       | 0.93        | 0.5748            | 11.53       | 0.0557  | 3.15        | 0.3060        |
| Faecalibaculum                      | 60.88       | <b>&lt;0.0001</b> | 7e-3        | 0.9368  | 2.88        | 0.1186        |
| Muribaculaceae                      | 65.03       | <b>&lt;0.0001</b> | 0.58        | 0.4943  | 0.06        | 0.8129        |
| <b>Ileum content</b>                |             |                   |             |         |             |               |
| Phylum or genera relative abundance | Diet        |                   | Genotype    |         | Interaction |               |
|                                     | % variation | p-value           | % variation | p-value | % variation | p-value       |
| Firmicutes                          | 73.57       | <b>&lt;0.0001</b> | 7.1e-5      | 0.9931  | 0.02        | 0.8826        |
| Bacteroidetes                       | 79.91       | <b>&lt;0.0001</b> | 0.01        | 0.8644  | 0.05        | 0.7759        |
| Actinobacteria                      | 2.37        | 0.4087            | 0.63        | 0.6683  | 2.30        | 0.4153        |
| Bifidobacterium                     | 0.03        | 0.9245            | 0.44        | 0.7187  | 5.43        | 0.2133        |
| Coriobacteriaceae_UCG-002           | 34.06       | <b>0.0005</b>     | 0.45        | 0.6536  | 2.50        | 0.2982        |
| Streptococcus                       | 5.59        | 0.1962            | 2.06        | 0.4285  | 3.66        | 0.2930        |
| Lactobacillus                       | 0.13        | 0.8408            | 4.44        | 0.2600  | 1.75        | 0.4762        |
| Faecalibaculum                      | 57.77       | <b>&lt;0.0001</b> | 1.65        | 0.2131  | 10.81       | <b>0.0030</b> |
| Muribaculaceae                      | 77.50       | <b>&lt;0.0001</b> | 6e-3        | 0.9200  | 0.04        | 0.8067        |

**Supplementary Table 2.** Effect of diet or genotype on bacteria relative abundance by 2-way ANOVA analysis.

| <b>Jejunum MAB</b>                  |             |                   |             |               |             |               |
|-------------------------------------|-------------|-------------------|-------------|---------------|-------------|---------------|
| Phylum or genera relative abundance | Diet        |                   | Genotype    |               | Interaction |               |
|                                     | % variation | p-value           | % variation | p-value       | % variation | p-value       |
| Firmicutes                          | 64.11       | <b>&lt;0.0001</b> | 3.68        | 0.1010        | 6.68        | <b>0.0306</b> |
| Bacteroidetes                       | 84.20       | <b>&lt;0.0001</b> | 5e-3        | 0.9244        | 2.07        | 0.0822        |
| Actinobacteria                      | 11.53       | <b>0.0413</b>     | 27.55       | <b>0.0028</b> | 1.66        | 0.4211        |
| Bifidobacterium                     | 2.87        | 0.3552            | 18.73       | <b>0.0241</b> | 0.04        | 0.9089        |
| Gastranaerophilales                 | 15.13       | <b>0.0079</b>     | 15.13       | <b>0.0079</b> | 15.13       | <b>0.0079</b> |
| Parasutterella                      | 74.08       | <b>&lt;0.0001</b> | 1.65        | 0.1796        | 1.62        | 0.1834        |
| Lactobacillus                       | 2.96        | 0.3364            | 7.23        | 0.1380        | 7.47        | 0.1318        |
| Faecalibaculum                      | 42.82       | <b>0.0002</b>     | 0.07        | 0.8585        | 0.08        | 0.8481        |
| Muribaculaceae                      | 53.09       | <b>&lt;0.0001</b> | 2.85        | 0.2167        | 0.25        | 0.7077        |
| <b>Ileum MAB</b>                    |             |                   |             |               |             |               |
| Phylum or genera relative abundance | Diet        |                   | Genotype    |               | Interaction |               |
|                                     | % variation | p-value           | % variation | p-value       | % variation | p-value       |
| Firmicutes                          | 27.19       | <b>0.0016</b>     | 2.13        | 0.3398        | 0.44        | 0.6605        |
| Bacteroidetes                       | 55.05       | <b>&lt;0.0001</b> | 1.32        | 0.3272        | 1.79        | 0.2560        |
| Actinobacteria                      | 11.59       | <b>0.0425</b>     | 6.28        | 0.1295        | 1.36        | 0.4728        |
| Bifidobacterium                     | 3.35        | 0.2854            | 4.39        | 0.2225        | 1.11        | 0.5363        |
| Coriobacteriaceae_UCG-002           | 34.60       | <b>0.0002</b>     | 1.37        | 0.4088        | 0.02        | 0.9080        |
| Dubosiella                          | 0.03        | 0.9124            | 2.24        | 0.3935        | 1.87        | 0.4349        |
| Lachnoclostridium                   | 1.80        | 0.3983            | 2.78        | 0.2949        | 16.30       | <b>0.0148</b> |
| Marvinbryantia                      | 24.60       | <b>0.0006</b>     | 10.93       | <b>0.0168</b> | 9.37        | <b>0.0259</b> |
| [Eubacterium]_brachy_group          | 16.86       | <b>0.0067</b>     | 9.30        | <b>0.0391</b> | 9.30        | <b>0.0391</b> |
| Lactobacillus                       | 8.73        | 0.0619            | 6.48        | 0.1052        | 12.07       | <b>0.0298</b> |
| Faecalibaculum                      | 58.08       | <b>&lt;0.0001</b> | 0.92        | 0.3722        | 2.28        | 0.1650        |
| Muribaculaceae                      | 54.18       | <b>&lt;0.0001</b> | 1.26        | 0.3337        | 1.87        | 0.2412        |
| Candidatus_Arthromitus              | 23.47       | <b>0.0028</b>     | 2.30        | 0.3181        | 1.11        | 0.3243        |

**Supplementary Table 3.** Effect of diet or genotype on the activity of the protein extract 2-way ANOVA analysis.

| Transcript                          | Diet        |               | Genotype    |                   | Interaction |               |
|-------------------------------------|-------------|---------------|-------------|-------------------|-------------|---------------|
|                                     | % variation | p-value       | % variation | p-value           | % variation | p-value       |
| <i>Escherichia coli</i>             | 14.61       | 0.1111        | 26.09       | <b>0.0403</b>     | 0.04        | 0.9238        |
| <i>Bifidobacterium longum</i>       | 6.58        | <b>0.0399</b> | 64.39       | <b>&lt;0.0001</b> | 14.15       | <b>0.0055</b> |
| <i>Lactobacillus reuteri</i>        | 7e-3        | 0.9713        | 25.14       | <b>0.0499</b>     | 11.38       | 0.1681        |
| <i>Bacteroides thetaiotaomicron</i> | 1.00        | 0.4506        | 81.45       | <b>&lt;0.0001</b> | 1.63        | 0.3389        |

**Supplementary Table 4.** Effect of diet or genotype on metabolic parameters by 2-way ANOVA analysis.

| Transcript       | Diet        |                   | Genotype    |         | Interaction |               |
|------------------|-------------|-------------------|-------------|---------|-------------|---------------|
|                  | % variation | p-value           | % variation | p-value | % variation | p-value       |
| Weight (g)       | 40.75       | <b>&lt;0.0001</b> | 2.39        | 0.2578  | 0.12        | 0.7978        |
| Glucose (nM)     | 24.25       | <b>0.0011</b>     | 4.04        | 0.1516  | 8.83        | <b>0.0375</b> |
| Insulin (ng/ml)  | 40.07       | <b>&lt;0.0001</b> | 0.64        | 0.5554  | 3e-4        | 0.9891        |
| HOMA-IR          | 35.47       | <b>0.0001</b>     | 2.11        | 0.2949  | 0.96        | 0.4778        |
| Body fat (%)     | 46.68       | <b>&lt;0.0001</b> | 0.24        | 0.6944  | 0.97        | 0.4389        |
| Glucose AUC (nM) | 3.53        | 0.2665            | 4.67        | 0.2027  | 2.44        | 0.3539        |
| Insulin (AUC)    | 36.95       | <b>0.0001</b>     | 0.27        | 0.7096  | 2e-4        | 0.9911        |

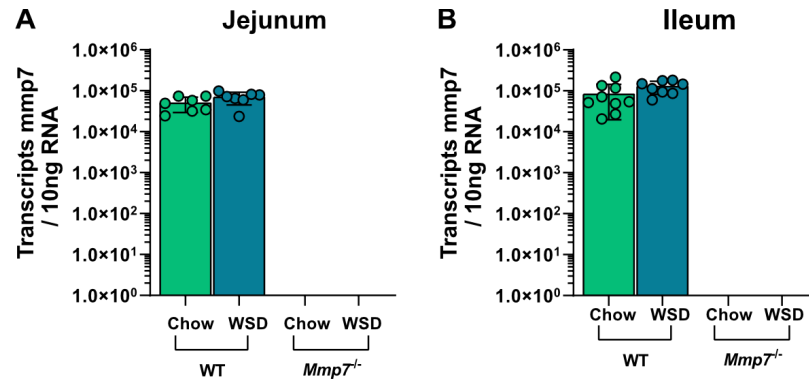

**Supplementary Figure 1. Expression of *Mmp7*.** *Mmp7* expression determined for WT and *Mmp7*<sup>-/-</sup> mice fed a chow or WSD at the jejunum (A) and at the ileum (B).

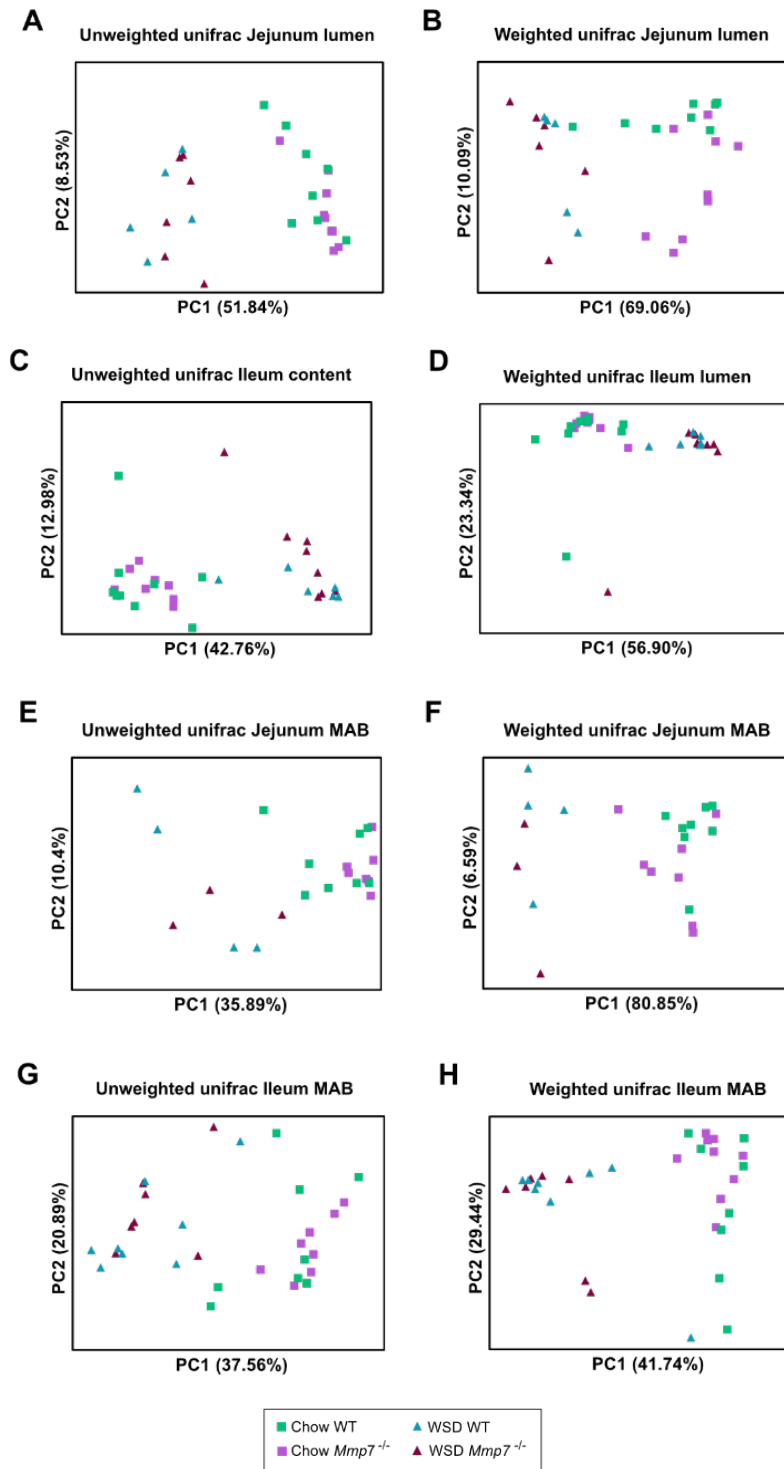

**Supplementary Figure 2.  $\beta$ -diversity analysis of WT and *Mmp7*<sup>-/-</sup> mice fed a chow or WSD.** Unweighted unifrac for jejunum content (A), ileum content (C), jejunum mucosa (MAB) (E) and ileum mucosa (G). Weighted Unifrac for jejunum content (B), ileum content (D), jejunum mucosa (F) and ileum mucosa (H). Statistical significance was calculated with a PERMANOVA analysis ns=  $p > 0.05$ , \* =  $p \leq 0.05$ , \*\* =  $p \leq 0.01$ , \*\*\* =  $p \leq 0.001$ .

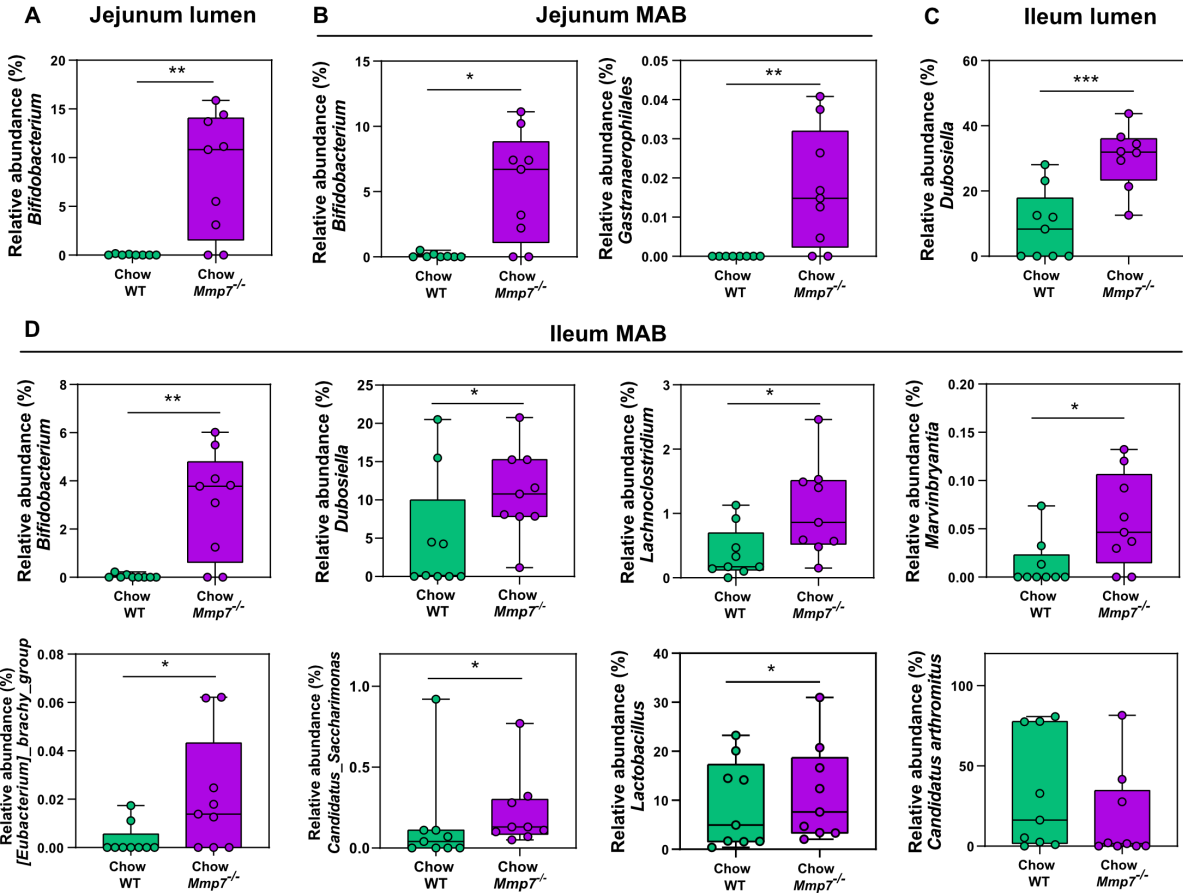

**Supplementary Figure 3. Microbiota relative abundance.** Relative abundance analysis of significantly enriched genera at the jejunum lumen (A), jejunum mucosa (MAB) (B), ileum lumen (C) and ileum mucosa (D) of chow-fed WT or *Mmp7*<sup>-/-</sup> mice. Statistical significance was calculated with a Mann-Whitney test ns= p > 0.05, \* = p ≤ 0.05, \*\* = p ≤ 0.01, \*\*\* = p ≤ 0.001.

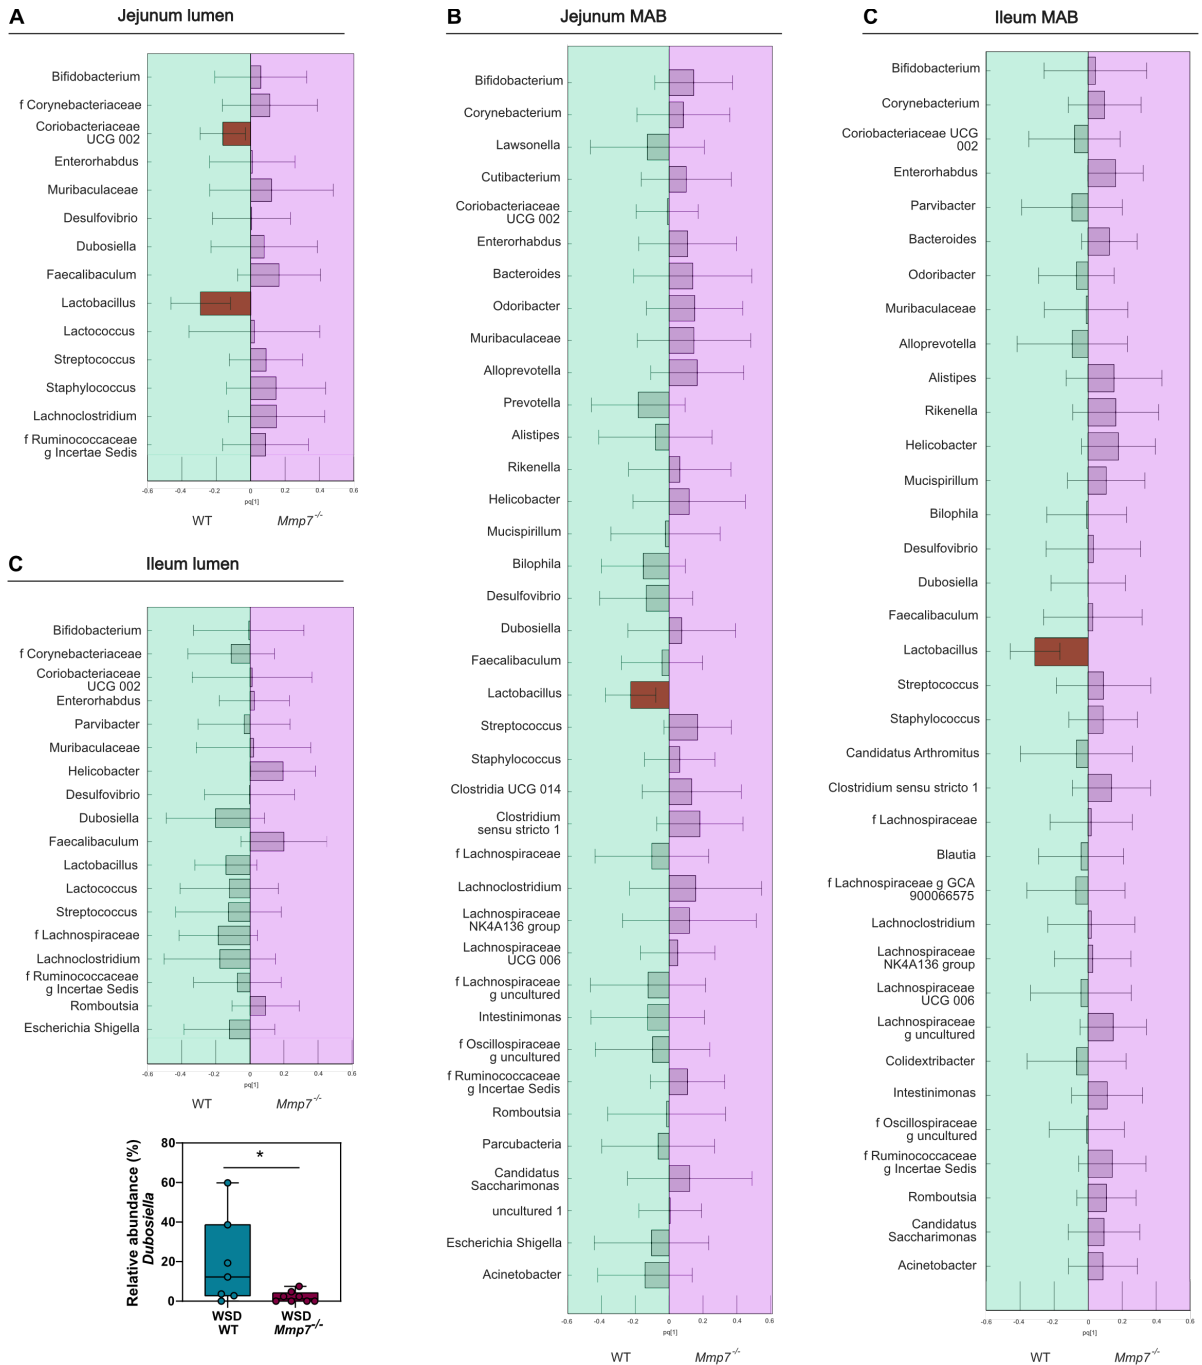

#### Supplementary Figure 4. OPLS-DA analysis between genotype in WSD fed mice.

Orthogonal Partial Least Squares Discriminant Analysis (OPLS-DA) of bacterial genera in the jejunal lumen (A), at the jejunal mucosa (MAB) (B), in the ileal lumen (C) and at the ileal mucosa (D) of WSD-fed wild-type and *Mmp7*<sup>-/-</sup> mice. *Dubosiella* relative abundance in WSD fed mice in the ileal lumen (C). Statistically significant difference in bacteria relative abundance in the OPLS-DA analysis was defined when the confidence interval did not contain the null hypothesis value (0). For the relative abundance analysis, the statistical analysis was performed with a Mann-Whitney test ns=  $p > 0.05$ , \* =  $p \leq 0.05$ , \*\* =  $p \leq 0.01$ , \*\*\* =  $p \leq 0.001$ .



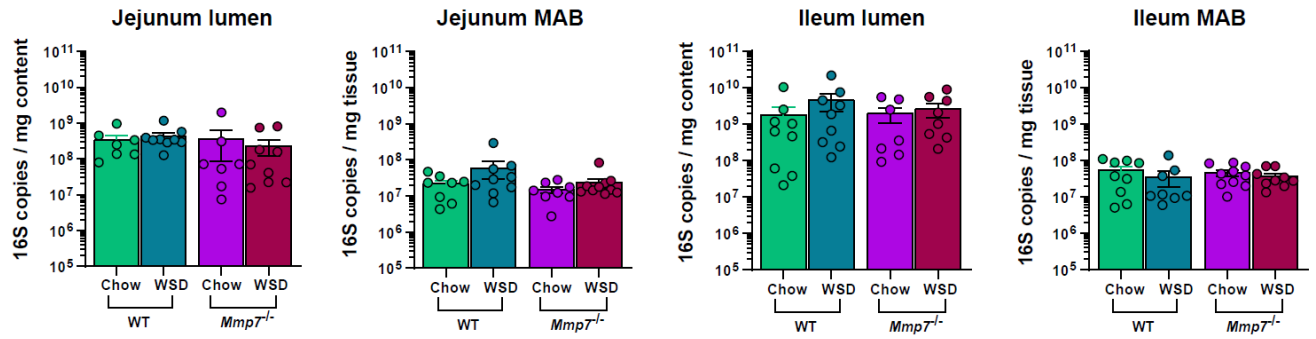

**Supplementary Figure 5. Total bacteria quantification in chow- and WSD-fed WT and *Mmp7*<sup>-/-</sup> mice.** The total bacteria amount was determined by measuring the 16S gene transcript copy number per mg of the jejunum and ileum luminal content, or per mg of tissue of jejunum or ileum mucosa (MAB). Statistical significance was determined by two-way ANOVA analysis with \*=  $p \leq 0.05$ , \*\*=  $p \leq 0.01$ , \*\*\*=  $p \leq 0.001$ .
